# Supplementary material
Source: publisher site journal article supplement (https://www.spandidos-publications.com/7166/downloadSupplementary)
Supplement: Supplementary file 1 [file downloadSupplementary]

Table SI. Sequences of the primers for reverse transcription-quantitative PCR and GLP-1R siRNA.

| Name               | Primer sequence (5'-3')    |
|--------------------|----------------------------|
| Acyl-CoA oxidase 1 | F: GGAATTTGGCATCGCAGACC    |
|                    | R: ACATGCCCAAGTGAAGGTCC    |
| $\beta$ -actin     | F: ACCTTCTACAATGAGCTGCG    |
|                    | R: CTGGATGGCTACGTACATGG    |
| GLP-1R siRNA       | F: GAGAGAAACUUUCCUGAGGAATT |
|                    | R: UCCUCAGGAAAGUUUCUCUCTT  |
| Control siRNA      | F: UUCUCCGAACGUGUCACGUTT   |
|                    | R: ACGUGACACGUUCGGAGAATT   |

F, forward; R, reverse; siRNA, small interfering RNA; GLP-1R, glucagon-like peptide-1 receptor.

Table SII. List of the differentially expressed proteins reversed by semaglutide between T2DM/Control and Sema/T2DM.

| Accession | Protein Name                                                                       | Gene name | T2DM/C<br>ontrol | Sema/<br>T2DM |
|-----------|------------------------------------------------------------------------------------|-----------|------------------|---------------|
| B2RY04    | Dedicator of cytokinesis protein 5                                                 | Dock5     | 1.528            | 0.544         |
| E9Q634    | Unconventional myosin-Ie                                                           | Myo1e     | 1.497            | 0.633         |
| E9Q7G0    | Nuclear mitotic apparatus protein 1                                                | Numa1     | 1.209            | 0.797         |
| O09164    | Extracellular superoxide dismutase [Cu-Zn]                                         | Sod3      | 0.504            | 2.719         |
| O35544    | Excitatory amino acid transporter 4                                                | Slc1a6    | 25.288           | 0.016         |
| O55128    | Histone deacetylase complex subunit SAP18                                          | Sap18     | 1.394            | 0.434         |
| O70309    | Integrin beta-5                                                                    | Itgb5     | 1.477            | 0.380         |
| O70362    | Phosphatidylinositol-glycan-specific phospholipase D                               | Gpld1     | 1.258            | 0.632         |
| O70433    | Four and a half LIM domains protein 2                                              | Fhl2      | 0.620            | 1.881         |
| O88343    | Electrogenic sodium bicarbonate cotransporter 1                                    | Slc4a4    | 1.457            | 0.548         |
| O88502    | High affinity cAMP-specific and IBMX-insensitive 3',5'-cyclic phosphodiesterase 8A | Pde8a     | 1.391            | 0.657         |
| O88967    | ATP-dependent zinc metalloprotease YME1L1                                          | Yme1l1    | 1.226            | 0.793         |
| O89051    | Integral membrane protein 2B                                                       | Itm2b     | 1.398            | 0.618         |
| P00520    | Tyrosine-protein kinase ABL1                                                       | Abl1      | 1.704            | 0.555         |
| P00920    | Carbonic anhydrase 2                                                               | Ca2       | 1.295            | 0.629         |
| P06728    | Apolipoprotein A-IV                                                                | Apoa4     | 1.662            | 0.671         |
| P06797    | Procathepsin L                                                                     | Ctsl      | 0.499            | 4.213         |
| P0C605    | cGMP-dependent protein kinase 1                                                    | Prkg1     | 2.471            | 0.380         |
| P11859    | Angiotensinogen                                                                    | Agt       | 1.838            | 0.480         |
| P11881    | Inositol 1,4,5-trisphosphate receptor type 1                                       | Itpr1     | 2.904            | 0.385         |
| P12658    | Calbindin                                                                          | Calb1     | 2.435            | 0.278         |
| P14733    | Lamin-B1                                                                           | Lmnb1     | 1.374            | 0.668         |
| P15331    | Peripherin                                                                         | Prph      | 2.561            | 0.413         |
| P18653    | Ribosomal protein S6 kinase alpha-1                                                | Rps6ka1   | 1.482            | 0.540         |
| P19258    | Protein Mpv17                                                                      | Mpv17     | 0.668            | 3.569         |
| P20060    | Beta-hexosaminidase subunit beta                                                   | Hexb      | 0.795            | 1.489         |
| P25911    | Tyrosine-protein kinase Lyn                                                        | Lyn       | 1.650            | 0.461         |
| P27546    | Microtubule-associated protein 4                                                   | Map4      | 1.246            | 0.790         |
| P28230    | Gap junction beta-1 protein                                                        | Gjb1      | 1.867            | 0.465         |
| P28651    | Carbonic anhydrase-related protein                                                 | Ca8       | 29.200           | 0.012         |
| P28661    | Septin-4                                                                           | Septin4   | 1.319            | 0.588         |
| P28665    | Murinoglobulin-1                                                                   | Mug1      | 1.471            | 0.398         |
| P28828    | Receptor-type tyrosine-protein phosphatase mu                                      | Ptprm     | 1.726            | 0.539         |
| P31786    | Acyl-CoA-binding protein                                                           | Dbi       | 1.668            | 0.291         |

|        |                                                      |          |       |       |
|--------|------------------------------------------------------|----------|-------|-------|
| P34022 | Ran-specific GTPase-activating protein               | Ranbp1   | 0.746 | 1.942 |
| P35436 | Glutamate receptor ionotropic, NMDA 2A               | Grin2a   | 0.746 | 1.323 |
| P39061 | Collagen alpha-1(XVIII) chain                        | Col18a1  | 1.370 | 0.611 |
| P46097 | Synaptotagmin-2                                      | Syt2     | 2.368 | 0.397 |
| P47740 | Aldehyde dehydrogenase family 3 member A2            | Aldh3a2  | 1.253 | 0.783 |
| P48193 | Protein 4.1                                          | Epb41    | 1.701 | 0.513 |
| P51859 | Hepatoma-derived growth factor                       | Hdgf     | 1.364 | 0.539 |
| P52825 | Carnitine O-palmitoyltransferase 2, mitochondrial    | Cpt2     | 1.257 | 0.729 |
| P54763 | Ephrin type-B receptor 2                             | Ephb2    | 1.471 | 0.674 |
| P56528 | ADP-ribosyl cyclase/cyclic ADP-ribose hydrolase 1    | Cd38     | 2.463 | 0.160 |
| P56564 | Excitatory amino acid transporter 1                  | Slc1a3   | 1.275 | 0.341 |
| P56942 | Pro-MCH                                              | Pmch     | 1.438 | 0.354 |
| P59114 | mRNA (2'-O-methyladenosine-N(6)-methyltransferase    | Pcif1    | 1.880 | 0.418 |
| P62267 | Small ribosomal subunit protein uS12                 | Rps23    | 0.716 | 1.863 |
| P63141 | Potassium voltage-gated channel subfamily A member 2 | Kcna2    | 1.367 | 0.467 |
| P63158 | High mobility group protein B1                       | Hmgb1    | 1.293 | 0.491 |
| P70377 | Fibroblast growth factor 13                          | Fgf13    | 0.704 | 1.500 |
| P70429 | Ena/VASP-like protein                                | Evl      | 0.821 | 1.288 |
| P83917 | Chromobox protein homolog 1                          | Cbx1     | 1.411 | 0.508 |
| P97290 | Plasma protease C1 inhibitor                         | Serping1 | 1.318 | 0.428 |
| P97346 | Nucleoredoxin                                        | Nxn      | 1.468 | 0.690 |
| P97772 | Metabotropic glutamate receptor 1                    | Grm1     | 1.837 | 0.561 |
| P97863 | Nuclear factor 1 B-type                              | Nfib     | 2.361 | 0.229 |
| Q00560 | Interleukin-6 receptor subunit beta                  | Il6st    | 1.331 | 0.568 |
| Q00899 | Transcriptional repressor protein YY1                | Yy1      | 1.650 | 0.706 |
| Q02257 | Junction plakoglobin                                 | Jup      | 1.321 | 0.669 |
| Q02357 | Ankyrin-1                                            | Ank1     | 1.988 | 0.496 |
| Q02780 | Nuclear factor 1 A-type                              | Nfia     | 2.568 | 0.356 |
| Q03137 | Ephrin type-A receptor 4                             | Epha4    | 0.691 | 1.597 |
| Q04750 | DNA topoisomerase 1                                  | Top1     | 0.756 | 1.346 |
| Q05512 | Serine/threonine-protein kinase MARK2                | Mark2    | 0.767 | 1.350 |
| Q05BC3 | Echinoderm microtubule-associated protein-like 1     | Eml1     | 1.321 | 0.702 |
| Q0QWG9 | Delphilin                                            | Grid2ip  | 6.512 | 0.225 |
| Q14BI2 | Metabotropic glutamate receptor 2                    | Grm2     | 0.787 | 2.086 |
| Q3TEL6 | E3 ubiquitin ligase Rnf157                           | Rnf157   | 1.441 | 0.779 |
| Q3TWN3 | Metal transporter CNNM2                              | Cnm2     | 1.236 | 0.792 |
| Q3V0I2 | Proline-rich protein 7                               | Prr7     | 0.467 | 1.802 |

|        |                                                                                            |          |       |       |
|--------|--------------------------------------------------------------------------------------------|----------|-------|-------|
| Q4PZA2 | Endothelin-converting enzyme 1                                                             | Ece1     | 1.397 | 0.584 |
| Q5DU14 | Unconventional myosin-XVI                                                                  | Myo16    | 0.693 | 1.847 |
| Q60722 | Transcription factor 4                                                                     | Tcf4     | 1.748 | 0.313 |
| Q60770 | Syntaxin-binding protein 3                                                                 | Stxbp3   | 1.236 | 0.704 |
| Q60953 | Protein PML                                                                                | Pml      | 2.114 | 0.532 |
| Q61481 | Dual specificity calcium/calmodulin-dependent 3',5'-cyclic nucleotide phosphodiesterase 1A | Pde1a    | 0.761 | 1.471 |
| Q61625 | Glutamate receptor ionotropic, delta-2                                                     | Grid2    | 5.728 | 0.150 |
| Q62092 | Neuronal vesicle trafficking-associated protein 1                                          | Nsg1     | 1.769 | 0.622 |
| Q64133 | Amine oxidase [flavin-containing] A                                                        | Maoa     | 1.304 | 0.692 |
| Q64444 | Carbonic anhydrase 4                                                                       | Ca4      | 1.735 | 0.745 |
| Q64518 | Sarcoplasmic/endoplasmic reticulum calcium ATPase 3                                        | Atp2a3   | 1.333 | 0.686 |
| Q64524 | Histone H2B type 2-E                                                                       | H2bc21   | 2.119 | 0.626 |
| Q65CL1 | Catenin alpha-3                                                                            | Ctnna3   | 1.954 | 0.499 |
| Q69ZX8 | Actin-binding LIM protein 3                                                                | Ablim3   | 1.490 | 0.568 |
| Q6DID3 | SR-related and CTD-associated factor 8                                                     | Scaf8    | 1.563 | 0.574 |
| Q6PGC1 | ATP-dependent RNA helicase DHX29                                                           | Dhx29    | 1.312 | 0.424 |
| Q6PHS9 | Voltage-dependent calcium channel subunit alpha-2/delta-2                                  | Cacna2d2 | 1.500 | 0.511 |
| Q6URW6 | Myosin-14                                                                                  | Myh14    | 1.318 | 0.722 |
| Q6WQJ1 | Diacylglycerol lipase-alpha                                                                | Dagla    | 1.345 | 0.642 |
| Q6ZWR6 | Nesprin-1                                                                                  | Syne1    | 1.206 | 0.786 |
| Q71M36 | Chondroitin sulfate proteoglycan 5                                                         | Cspg5    | 0.718 | 1.557 |
| Q7TNC9 | Inositol polyphosphate-5-phosphatase A                                                     | Inpp5a   | 1.987 | 0.422 |
| Q7TPD3 | Roundabout homolog 2                                                                       | Robo2    | 0.734 | 1.646 |
| Q80UP8 | Sodium-dependent phosphate transporter 2                                                   | Slc20a2  | 1.775 | 0.535 |
| Q80W54 | CAAX prenyl protease 1 homolog                                                             | Zmpste24 | 1.311 | 0.624 |
| Q80YX1 | Tenascin                                                                                   | Tnc      | 1.456 | 0.509 |
| Q8BGV8 | Mitochondrial dynamics protein MID51                                                       | Mief1    | 1.223 | 0.823 |
| Q8BKG3 | Inactive tyrosine-protein kinase 7                                                         | Ptk7     | 1.210 | 0.724 |
| Q8BMI0 | F-box only protein 38                                                                      | Fbxo38   | 1.511 | 0.418 |
| Q8BT60 | Copine-3                                                                                   | Cpne3    | 1.232 | 0.744 |
| Q8BX09 | Retinoblastoma-binding protein 5                                                           | Rbbp5    | 1.521 | 0.816 |
| Q8BYR5 | Calcium-dependent secretion activator 2                                                    | Cadps2   | 1.250 | 0.768 |
| Q8C050 | Ribosomal protein S6 kinase alpha-5                                                        | Rps6ka5  | 1.428 | 0.615 |
| Q8C650 | Septin-10                                                                                  | Septin10 | 1.327 | 0.830 |
| Q8JZM4 | Delta and Notch-like epidermal growth factor-related receptor                              | Dner     | 1.625 | 0.530 |

|        |                                                                    |         |       |       |
|--------|--------------------------------------------------------------------|---------|-------|-------|
| Q8K0T7 | Protein unc-13 homolog C                                           | Unc13c  | 2.001 | 0.496 |
| Q8K1S4 | Netrin receptor UNC5A                                              | Unc5a   | 0.824 | 1.493 |
| Q8K2P7 | Sodium-coupled neutral amino acid symporter 1                      | Slc38a1 | 1.761 | 0.576 |
| Q8K4B4 | Interleukin-23 receptor                                            | Il23r   | 1.653 | 0.066 |
| Q8K4Q7 | Ceramide kinase                                                    | Cerk    | 1.876 | 0.653 |
| Q8QZV7 | Integrator complex subunit 13                                      | IntS13  | 1.469 | 0.521 |
| Q8R1S4 | Protein MTSS 1                                                     | Mtss1   | 3.519 | 0.329 |
| Q8VDQ8 | NAD-dependent protein deacetylase sirtuin-2                        | Sirt2   | 1.278 | 0.671 |
| Q8VHC3 | Selenoprotein M                                                    | Selenom | 1.641 | 0.325 |
| Q8VHI3 | GDP-fucose protein O-fucosyltransferase 2                          | Pofut2  | 1.358 | 0.758 |
| Q8VHL0 | Urea transporter 1                                                 | Slc14a1 | 1.670 | 0.327 |
| Q91VJ2 | Caveolae-associated protein 3                                      | Cavin3  | 1.346 | 0.396 |
| Q91VR8 | Protein BRICK1                                                     | Brk1    | 0.709 | 1.956 |
| Q91W43 | Glycine dehydrogenase (decarboxylating), mitochondrial             | Gldc    | 0.782 | 1.584 |
| Q91WL8 | WW domain-containing oxidoreductase                                | Wwox    | 1.238 | 0.589 |
| Q91XU3 | Phosphatidylinositol 5-phosphate 4-kinase type-2 gamma             | Pip4k2c | 0.798 | 1.485 |
| Q91YL2 | E3 ubiquitin-protein ligase RNF126                                 | Rnf126  | 0.698 | 1.701 |
| Q91ZZ3 | Beta-synuclein                                                     | Sncb    | 1.270 | 0.557 |
| Q920N7 | Synaptotagmin-12                                                   | Syt12   | 1.344 | 0.558 |
| Q920R0 | Alsin                                                              | Als2    | 1.322 | 0.612 |
| Q922H1 | Protein arginine N-methyltransferase 3                             | Prmt3   | 1.288 | 0.559 |
| Q924X6 | Low-density lipoprotein receptor-related protein 8                 | Lrp8    | 1.398 | 0.425 |
| Q99JP6 | Homer protein homolog 3                                            | Homer3  | 8.855 | 0.086 |
| Q99K30 | Epidermal growth factor receptor kinase substrate 8-like protein 2 | Eps8l2  | 3.027 | 0.161 |
| Q99LI2 | Chloride channel CLIC-like protein 1                               | Clcc1   | 1.227 | 0.576 |
| Q99MI1 | ELKS/Rab6-interacting/CAST family member 1                         | Erc1    | 1.352 | 0.697 |
| Q99PM3 | Transcription initiation factor IIA subunit 1                      | Gtf2a1  | 1.528 | 0.472 |
| Q99PU5 | Long-chain-fatty-acid--CoA ligase ACSBG1                           | Acsbg1  | 1.357 | 0.704 |
| Q9CPR4 | Large ribosomal subunit protein uL22                               | Rpl17   | 0.719 | 2.134 |
| Q9CW03 | Structural maintenance of chromosomes protein 3                    | Smc3    | 1.377 | 0.623 |
| Q9CY34 | NEDD8-conjugating enzyme UBE2F                                     | Ube2f   | 1.226 | 0.606 |
| Q9DBE0 | Cysteine sulfinic acid decarboxylase                               | Csad    | 1.374 | 0.696 |
| Q9DBY5 | Chromobox protein homolog 6                                        | Cbx6    | 2.183 | 0.689 |
| Q9EP69 | Phosphatidylinositol-3-phosphatase SAC1                            | Sacm11  | 1.207 | 0.793 |
| Q9EPR4 | Solute carrier family 23 member 2                                  | Slc23a2 | 1.255 | 0.317 |
| Q9EQ61 | Pescadillo homolog                                                 | Pes1    | 1.220 | 0.467 |

|        |                                                                             |         |       |       |
|--------|-----------------------------------------------------------------------------|---------|-------|-------|
| Q9EQK7 | Protein-S-isoprenylcysteine O-methyltransferase                             | Icmt    | 3.480 | 0.095 |
| Q9ERQ8 | Carbonic anhydrase 7                                                        | Ca7     | 2.352 | 0.482 |
| Q9JI59 | Junctional adhesion molecule B                                              | Jam2    | 1.356 | 0.421 |
| Q9JL35 | High mobility group nucleosome-binding domain-containing protein 5          | Hmgn5   | 1.822 | 0.310 |
| Q9QZN1 | F-box/LRR-repeat protein 17                                                 | Fbx117  | 1.408 | 0.776 |
| Q9R0A1 | Chloride channel protein 2                                                  | Clcn2   | 1.871 | 0.541 |
| Q9R0H0 | Peroxisomal acyl-coenzyme A oxidase 1                                       | Acox1   | 1.235 | 0.710 |
| Q9R226 | KH domain-containing, RNA-binding, signal transduction-associated protein 3 | Khdrbs3 | 0.766 | 1.671 |
| Q9WVK8 | Cholesterol 24-hydroxylase                                                  | Cyp46a1 | 0.795 | 1.975 |
| Q9Z1M8 | Protein Red                                                                 | Ik      | 1.279 | 0.493 |
| Q9Z1Q5 | Chloride intracellular channel protein 1                                    | Clic1   | 1.463 | 0.378 |
| Q9Z2I8 | Succinate--CoA ligase [GDP-forming] subunit beta, mitochondrial             | Suclg2  | 1.330 | 0.645 |
| Q9Z2W8 | Glutamate receptor 4                                                        | Gria4   | 1.337 | 0.652 |
| A2AHG0 | Leucine zipper putative tumor suppressor 3                                  | Lzts3   | 0.800 | 1.339 |
| E9Q137 | Testis-expressed protein 264 homolog                                        | Tex264  | 1.312 | 0.639 |
| P29758 | Ornithine aminotransferase, mitochondrial                                   | Oat     | 1.224 | 0.736 |
| P59999 | Actin-related protein 2/3 complex subunit 4                                 | Arpc4   | 0.723 | 1.345 |
| P61971 | Nuclear transport factor 2                                                  | Nutf2   | 1.435 | 0.471 |
| P62956 | Voltage-dependent calcium channel gamma-7 subunit                           | Cacng7  | 1.632 | 0.592 |
| P97376 | Protein FRG1                                                                | Frg1    | 1.269 | 0.384 |
| P97429 | Annexin A4                                                                  | Anxa4   | 1.407 | 0.616 |
| Q08331 | Calretinin                                                                  | Calb2   | 2.084 | 0.472 |
| Q32NY4 | Metal transporter CNNM3                                                     | Cnm3    | 1.267 | 0.608 |
| Q3TB82 | Pleckstrin homology domain-containing family F member 1                     | Plekhf1 | 2.161 | 0.436 |
| Q640R3 | Hepatic and glial cell adhesion molecule                                    | Hepacam | 1.552 | 0.433 |
| Q6P1B3 | PILR alpha-associated neural protein                                        | Pianp   | 0.611 | 2.325 |
| Q76LS9 | Ubiquitin carboxyl-terminal hydrolase MINDY-1                               | Mindy1  | 1.512 | 0.660 |
| Q7TNF0 | Double C2-like domain-containing protein alpha                              | Doc2a   | 0.743 | 1.586 |
| Q80XA6 | RalBP1-associated Eps domain-containing protein 2                           | Reps2   | 0.758 | 1.596 |
| Q80YN3 | Breast carcinoma-amplified sequence 1 homolog                               | Bcas1   | 1.265 | 0.595 |
| Q80ZX8 | Sperm-associated antigen 1                                                  | Spag1   | 1.984 | 0.501 |
| Q8BS40 | Ceramide-1-phosphate transfer protein                                       | Cptp    | 1.452 | 0.587 |
| Q8BTV1 | Tumor suppressor candidate 3                                                | Tusc3   | 0.778 | 1.293 |
| Q8BWD8 | Cyclin-dependent kinase 19                                                  | Cdk19   | 1.576 | 0.189 |
| Q8BZB3 | Transmembrane protein 266                                                   | Tmem266 | 2.581 | 0.166 |

|        |                                                            |           |       |       |
|--------|------------------------------------------------------------|-----------|-------|-------|
| Q8CEE7 | Retinol dehydrogenase 13                                   | Rdh13     | 1.328 | 0.523 |
| Q8JZM0 | Dimethyladenosine transferase 1, mitochondrial             | Tfb1m     | 1.294 | 0.449 |
| Q8K297 | Procollagen galactosyltransferase 1                        | Colgalt1  | 1.374 | 0.564 |
| Q8K2T4 | Ubiquinol-cytochrome-c reductase complex assembly factor 3 | Uqcc3     | 1.619 | 0.479 |
| Q8K354 | Carbonyl reductase [NADPH] 3                               | Cbr3      | 0.788 | 1.731 |
| Q8R088 | Golgi phosphoprotein 3-like                                | Golph3l   | 1.604 | 0.671 |
| Q8VHP7 | Leukocyte elastase inhibitor B                             | Serpinb1b | 2.218 | 0.431 |
| Q91W59 | RNA-binding motif, single-stranded-interacting protein 1   | Rbms1     | 1.615 | 0.391 |
| Q91W92 | Cdc42 effector protein 1                                   | Cdc42ep1  | 1.584 | 0.473 |
| Q9CQI6 | Coactosin-like protein                                     | Cotl1     | 1.259 | 0.591 |
| Q9CWP6 | Motile sperm domain-containing protein 2                   | Mospd2    | 1.406 | 0.656 |
| Q9D1G3 | Protein-cysteine N-palmitoyltransferase HHAT-like protein  | Hhatl     | 2.052 | 0.391 |
| Q9D385 | ADP-ribosylation factor-like protein 2-binding protein     | Arl2bp    | 1.882 | 0.470 |
| Q9D975 | Sulfiredoxin-1                                             | Srxn1     | 1.255 | 0.326 |
| Q9D9E0 | Solute carrier family 22 member 17                         | Slc22a17  | 0.780 | 1.695 |
| Q9D9V3 | Ethylmalonyl-CoA decarboxylase                             | Echdc1    | 1.202 | 0.728 |
| Q9EQK5 | Major vault protein                                        | Mvp       | 1.268 | 0.618 |
| Q9JHU2 | Palmdelphin                                                | Palmd     | 0.760 | 1.781 |
| Q9JL62 | Glycolipid transfer protein                                | Gltp      | 1.387 | 0.634 |
| Q9QUN9 | Dickkopf-related protein 3                                 | Dkk3      | 0.744 | 1.314 |
| P17665 | Cytochrome c oxidase subunit 7C, mitochondrial             | Cox7c     | 2.002 | 0.484 |
| P49442 | Inositol polyphosphate 1-phosphatase                       | Inpp1     | 1.319 | 0.771 |
| P55099 | Tachykinin-3                                               | Tac3      | 2.127 | 0.363 |
| P62748 | Hippocalcin-like protein 1                                 | Hpcal1    | 1.859 | 0.457 |
| Q1RLL3 | Copine-9                                                   | Cpne9     | 1.488 | 0.433 |
| Q3TGF2 | Protein FAM107B                                            | Fam107b   | 5.546 | 0.143 |
| Q3TH73 | Protein tweety homolog 2                                   | Ttyh2     | 1.656 | 0.460 |
| Q3TY65 | Islet cell autoantigen 1-like protein                      | Ica1l     | 1.592 | 0.553 |
| Q3UFQ8 | Capping protein, Arp2/3 and myosin-I linker protein 3      | Carmil3   | 1.365 | 0.690 |
| Q3V384 | AFG1-like ATPase                                           | Afg1l     | 1.306 | 0.599 |
| Q6P5H6 | FERM domain-containing protein 5                           | Frmf5     | 1.967 | 0.649 |
| Q6ZQ82 | Rho GTPase-activating protein 26                           | Arhgap26  | 1.288 | 0.551 |
| Q80XD1 | Beta-chimaerin                                             | Chn2      | 2.174 | 0.280 |
| Q8BI08 | Protein MAL2                                               | Mal2      | 0.706 | 1.479 |
| Q8BK62 | Olfactomedin-like protein 3                                | Olfml3    | 0.540 | 2.021 |
| Q8BKY8 | Transcription termination factor 2, mitochondrial          | Mterf2    | 1.258 | 0.521 |

|        |                                                       |         |       |       |
|--------|-------------------------------------------------------|---------|-------|-------|
| Q8C0Z1 | Protein FAM234A                                       | Fam234a | 1.293 | 0.663 |
| Q8R4C2 | RUN and FYVE domain-containing protein 2              | Rufy2   | 1.372 | 0.604 |
| Q8VDN4 | Coiled-coil domain-containing protein 92              | Ccdc92  | 1.291 | 0.714 |
| Q99J25 | rRNA methyltransferase 1, mitochondrial               | Mrm1    | 1.919 | 0.659 |
| Q99LG2 | Transportin-2                                         | Tnpo2   | 0.808 | 1.613 |
| Q9CQA6 | Small ribosomal subunit protein mS37                  | Chchd1  | 0.505 | 2.934 |
| Q9CQE3 | Small ribosomal subunit protein uS17m                 | Mrps17  | 1.229 | 0.579 |
| Q9CYL5 | Golgi-associated plant pathogenesis-related protein 1 | Glipr2  | 1.809 | 0.554 |
| Q9D4F8 | Gamma-tubulin complex component 4                     | Tubgcp4 | 1.311 | 0.426 |
| P0DN89 | Transmembrane protein 254                             | Tmem254 | 1.334 | 0.513 |
| Q3UXZ6 | Protein FAM81A                                        | Fam81a  | 0.765 | 3.477 |
| Q3UY34 | Protein CUSTOS                                        | Custos  | 1.228 | 0.335 |
| Q78RX3 | Small integral membrane protein 12                    | Smim12  | 1.266 | 0.605 |
| Q80TB8 | Synaptic vesicle membrane protein VAT-1 homolog-like  | Vat1l   | 1.359 | 0.491 |
| Q8BHG2 | CXXC motif containing zinc binding protein            | Czib    | 1.318 | 0.723 |
| Q8BHI4 | Kelch repeat and BTB domain-containing protein 3      | Kbtbd3  | 1.488 | 0.545 |
| Q8BLR2 | Copine-4                                              | Cpne4   | 0.816 | 1.775 |
| Q8CD26 | Solute carrier family 35 member E1                    | Slc35e1 | 1.328 | 0.667 |
| Q8VCA8 | Secernin-2                                            | Scrn2   | 1.320 | 0.577 |
| Q91W34 | RUS family member 1                                   | Rusf1   | 1.407 | 0.405 |
| Q9CWN7 | CCR4-NOT transcription complex subunit 11             | Cnot11  | 1.409 | 0.594 |
| Q9D8W7 | OCIA domain-containing protein 2                      | Ociad2  | 0.778 | 1.942 |
| Q9DB29 | Isoamyl acetate-hydrolyzing esterase 1 homolog        | Iah1    | 1.458 | 0.684 |
| Q9JJF0 | Nucleosome assembly protein 1-like 5                  | Nap115  | 1.774 | 0.219 |

T2DM, type 2 diabetes melitus.

Table SIII. List of the Top 200 differentially expressed genes reversed by semaglutide between T2DM/Control and Sema/T2DM.

| RNA ID             | T2DM/Control | Sema/T2DM |
|--------------------|--------------|-----------|
| ENSMUST00000238946 | 4717.413     | 0.004     |
| ENSMUST00000232205 | 2593102.009  | 0.000     |
| ENSMUST00000230867 | 12490293.130 | 0.000     |
| ENSMUST00000228044 | 3347348.313  | 0.000     |
| ENSMUST00000227662 | 116.833      | 0.325     |
| ENSMUST00000227594 | 3626.291     | 0.003     |
| ENSMUST00000225488 | 4580633.704  | 0.000     |
| ENSMUST00000224812 | 687.567      | 0.000     |
| ENSMUST00000221807 | 351.225      | 0.006     |
| ENSMUST00000221074 | 12.981       | 0.004     |
| ENSMUST00000212964 | 66.314       | 0.000     |
| ENSMUST00000211136 | 237.320      | 0.081     |
| ENSMUST00000209206 | 7.475        | 0.001     |
| ENSMUST00000207143 | 517346.151   | 0.000     |
| ENSMUST00000201723 | 2.360        | 0.000     |
| ENSMUST00000199432 | 1888136.493  | 0.455     |
| ENSMUST00000198199 | 1888136.493  | 0.003     |
| ENSMUST00000195561 | 2.804        | 0.390     |
| ENSMUST00000191030 | 60.126       | 0.018     |
| ENSMUST00000188111 | 2.165        | 0.006     |
| ENSMUST00000181283 | 2421.865     | 0.004     |
| ENSMUST00000180081 | 2.471        | 0.217     |
| ENSMUST00000177476 | 2266297.708  | 0.000     |
| ENSMUST00000177326 | 415.718      | 0.002     |
| ENSMUST00000176263 | 4.756        | 0.003     |
| ENSMUST00000172002 | 2.113        | 0.439     |
| ENSMUST00000170219 | 126.979      | 0.253     |
| ENSMUST00000166384 | 4.292        | 0.377     |
| ENSMUST00000163257 | 3.327        | 0.283     |
| ENSMUST00000163034 | 65.306       | 0.011     |
| ENSMUST00000162872 | 3053450.824  | 0.000     |
| ENSMUST00000159459 | 131.674      | 0.004     |
| ENSMUST00000157040 | 94.529       | 0.034     |
| ENSMUST00000150412 | 2560869.916  | 0.000     |
| ENSMUST00000148955 | 2.267        | 0.007     |
| ENSMUST00000146384 | 14.777       | 0.005     |

|                    |              |       |
|--------------------|--------------|-------|
| ENSMUST00000141516 | 2.791        | 0.408 |
| ENSMUST00000140008 | 1936.550     | 0.001 |
| ENSMUST00000139699 | 16.657       | 0.108 |
| ENSMUST00000135260 | 2071616.466  | 0.003 |
| ENSMUST00000132459 | 2.235        | 0.001 |
| ENSMUST00000119422 | 3.608        | 0.343 |
| ENSMUST00000119398 | 4.274        | 0.364 |
| ENSMUST00000118366 | 2.329        | 0.256 |
| ENSMUST00000117757 | 6.243        | 0.175 |
| ENSMUST00000116403 | 92.182       | 0.012 |
| ENSMUST00000115333 | 2858808.218  | 0.000 |
| ENSMUST00000114773 | 3656054.764  | 0.000 |
| ENSMUST00000114627 | 1627155.107  | 0.007 |
| ENSMUST00000114608 | 1627155.107  | 0.003 |
| ENSMUST00000114402 | 640816.882   | 0.000 |
| ENSMUST00000113698 | 640816.882   | 0.000 |
| ENSMUST00000113693 | 2.832        | 0.234 |
| ENSMUST00000113686 | 2.832        | 0.000 |
| ENSMUST00000113331 | 168.534      | 0.005 |
| ENSMUST00000112523 | 5.126        | 0.360 |
| ENSMUST00000112424 | 263.649      | 0.040 |
| ENSMUST00000111564 | 163.706      | 0.433 |
| ENSMUST00000111221 | 163.886      | 0.025 |
| ENSMUST00000111219 | 163.886      | 0.007 |
| ENSMUST00000110889 | 79.157       | 0.025 |
| ENSMUST00000110520 | 3.241        | 0.024 |
| ENSMUST00000110382 | 39.613       | 0.263 |
| ENSMUST00000110042 | 707.705      | 0.445 |
| ENSMUST00000109786 | 197.776      | 0.464 |
| ENSMUST00000109492 | 7.086        | 0.195 |
| ENSMUST00000109194 | 2229.911     | 0.321 |
| ENSMUST00000108508 | 12.177       | 0.000 |
| ENSMUST00000107903 | 797.671      | 0.001 |
| ENSMUST00000106475 | 5322378.941  | 0.000 |
| ENSMUST00000106411 | 16.657       | 0.127 |
| ENSMUST00000106059 | 1215.927     | 0.006 |
| ENSMUST00000104902 | 350.346      | 0.007 |
| ENSMUST00000103033 | 10107260.550 | 0.006 |
| ENSMUST00000102903 | 2560869.916  | 0.482 |

|                    |              |             |
|--------------------|--------------|-------------|
| ENSMUST00000102752 | 7.086        | 0.248       |
| ENSMUST00000101432 | 60.575       | 0.030       |
| ENSMUST00000099444 | 5.228        | 0.005       |
| ENSMUST00000095521 | 1850.570     | 0.053       |
| ENSMUST00000093893 | 946.188      | 0.001       |
| ENSMUST00000093106 | 2.131        | 0.004       |
| ENSMUST00000092802 | 1379.513     | 0.044       |
| ENSMUST00000092227 | 5165611.631  | 0.000       |
| ENSMUST00000091325 | 341.196      | 0.000       |
| ENSMUST00000088763 | 284.172      | 0.005       |
| ENSMUST00000085044 | 410.799      | 0.003       |
| ENSMUST00000081162 | 311.754      | 0.003       |
| ENSMUST00000079415 | 6821.709     | 0.000       |
| ENSMUST00000079086 | 7.086        | 0.165       |
| ENSMUST00000077787 | 268.623      | 0.005       |
| ENSMUST00000073939 | 203.057      | 0.005       |
| ENSMUST00000070174 | 2017943.443  | 0.000       |
| ENSMUST00000069187 | 3.855        | 0.002       |
| ENSMUST00000067929 | 2.522        | 0.366       |
| ENSMUST00000067086 | 1839232.814  | 0.000       |
| ENSMUST00000065380 | 885.027      | 0.049       |
| ENSMUST00000055528 | 2.021        | 0.098       |
| ENSMUST00000048544 | 10074102.990 | 0.000       |
| ENSMUST00000047243 | 387.514      | 0.005       |
| ENSMUST00000032797 | 3.653        | 0.051       |
| ENSMUST00000030806 | 10225717.790 | 0.000       |
| ENSMUST00000028335 | 38.403       | 0.168       |
| ENSMUST00000017567 | 324.224      | 0.003       |
| ENSMUST00000234654 | 0.000        | 3253904.593 |
| ENSMUST00000219993 | 0.421        | 2.661       |
| ENSMUST00000207077 | 0.003        | 131.338     |
| ENSMUST00000206246 | 0.427        | 191.084     |
| ENSMUST00000202313 | 0.005        | 194.284     |
| ENSMUST00000197134 | 0.362        | 3.191       |
| ENSMUST00000183846 | 0.009        | 203.545     |
| ENSMUST00000182877 | 0.004        | 137.328     |
| ENSMUST00000182559 | 0.008        | 6.705       |
| ENSMUST00000182511 | 0.005        | 2.182       |
| ENSMUST00000182383 | 0.008        | 3.207       |

|                    |       |             |
|--------------------|-------|-------------|
| ENSMUST00000182213 | 0.008 | 176.417     |
| ENSMUST00000177738 | 0.001 | 529.714     |
| ENSMUST00000176464 | 0.020 | 198.580     |
| ENSMUST00000173078 | 0.006 | 97.496      |
| ENSMUST00000171238 | 0.000 | 2542185.368 |
| ENSMUST00000170374 | 0.366 | 2.066       |
| ENSMUST00000168871 | 0.271 | 5.776       |
| ENSMUST00000165786 | 0.393 | 2.134       |
| ENSMUST00000164963 | 0.006 | 3.986       |
| ENSMUST00000163370 | 0.476 | 2180951.535 |
| ENSMUST00000162269 | 0.037 | 2.932       |
| ENSMUST00000161938 | 0.002 | 456.547     |
| ENSMUST00000161600 | 0.000 | 8658198.525 |
| ENSMUST00000161279 | 0.133 | 4.038       |
| ENSMUST00000161254 | 0.005 | 51.851      |
| ENSMUST00000156177 | 0.039 | 2.570       |
| ENSMUST00000155901 | 0.003 | 2.042       |
| ENSMUST00000146592 | 0.006 | 2.544       |
| ENSMUST00000135344 | 0.003 | 498.119     |
| ENSMUST00000133268 | 0.039 | 2.767       |
| ENSMUST00000132583 | 0.008 | 318.708     |
| ENSMUST00000119211 | 0.388 | 135.263     |
| ENSMUST00000114795 | 0.007 | 473.870     |
| ENSMUST00000113624 | 0.000 | 4278.679    |
| ENSMUST00000112931 | 0.006 | 1962541.580 |
| ENSMUST00000112836 | 0.344 | 2.196       |
| ENSMUST00000112624 | 0.070 | 16.267      |
| ENSMUST00000111213 | 0.482 | 1760397.625 |
| ENSMUST00000109556 | 0.070 | 2.248       |
| ENSMUST00000109157 | 0.321 | 2.379       |
| ENSMUST00000108702 | 0.366 | 81.869      |
| ENSMUST00000107906 | 0.401 | 4.098       |
| ENSMUST00000106442 | 0.493 | 2.307       |
| ENSMUST00000106192 | 0.069 | 3.105       |
| ENSMUST00000105915 | 0.004 | 1205.681    |
| ENSMUST00000103116 | 0.001 | 2159541.664 |
| ENSMUST00000102760 | 0.393 | 2.005       |
| ENSMUST00000098521 | 0.000 | 3070900.271 |
| ENSMUST00000095076 | 0.002 | 2.561       |

|                    |       |             |
|--------------------|-------|-------------|
| ENSMUST00000094251 | 0.176 | 3.058       |
| ENSMUST00000092766 | 0.002 | 354.268     |
| ENSMUST00000089874 | 0.004 | 210.888     |
| ENSMUST00000084215 | 0.002 | 301.159     |
| ENSMUST00000084105 | 0.037 | 101.446     |
| ENSMUST00000076224 | 0.441 | 2.098       |
| ENSMUST00000071889 | 0.007 | 1268.040    |
| ENSMUST00000071087 | 0.387 | 1805777.574 |
| ENSMUST00000063607 | 0.003 | 303.831     |
| ENSMUST00000059287 | 0.005 | 181.081     |
| ENSMUST00000058496 | 0.000 | 320.279     |
| ENSMUST00000052449 | 0.006 | 327.023     |
| ENSMUST00000045550 | 0.439 | 3.280       |
| ENSMUST00000044019 | 0.007 | 2.360       |
| ENSMUST00000044009 | 0.001 | 470.766     |
| ENSMUST00000042498 | 0.437 | 2.093       |
| ENSMUST00000039165 | 0.002 | 1649.402    |
| ENSMUST00000038695 | 0.323 | 2.571       |
| ENSMUST00000038359 | 0.022 | 280.766     |
| ENSMUST00000037547 | 0.460 | 2.212       |
| ENSMUST00000035604 | 0.001 | 381.681     |
| ENSMUST00000034802 | 0.001 | 3564488.140 |
| ENSMUST00000032710 | 0.377 | 4.156       |
| ENSMUST00000032192 | 0.000 | 658.122     |
| ENSMUST00000032146 | 0.261 | 2.547       |
| ENSMUST00000030691 | 0.490 | 2.052       |
| ENSMUST00000028178 | 0.395 | 2.821       |
| ENSMUST00000026076 | 0.071 | 29.266      |
| ENSMUST00000018212 | 0.002 | 3324080.777 |
| ENSMUST00000004201 | 0.048 | 36.563      |
| ENSMUST00000212430 | 1.818 | 0.654       |
| ENSMUST00000195817 | 1.874 | 0.563       |
| ENSMUST00000189101 | 1.886 | 0.536       |
| ENSMUST00000185343 | 1.886 | 0.577       |
| ENSMUST00000171690 | 1.837 | 0.509       |
| ENSMUST00000169488 | 1.947 | 0.555       |
| ENSMUST00000159910 | 1.841 | 0.634       |
| ENSMUST00000116542 | 1.972 | 0.565       |
| ENSMUST00000109543 | 1.841 | 0.648       |

|                    |       |       |
|--------------------|-------|-------|
| ENSMUST00000092425 | 1.901 | 0.588 |
| ENSMUST00000067081 | 1.849 | 0.619 |
| ENSMUST00000029416 | 1.836 | 0.666 |
| ENSMUST00000027760 | 1.839 | 0.533 |
| ENSMUST00000017548 | 1.901 | 0.687 |
| ENSMUST00000207858 | 1.732 | 0.618 |
| ENSMUST00000147076 | 1.737 | 0.589 |
| ENSMUST00000137868 | 1.725 | 0.603 |

T2DM, type 2 diabetes melitus.

Table SIV. Conjoint GO enrichment analysis results of T2DM vs. Control and Sema vs. T2DM.

|                                                                              |                                                                       |
|------------------------------------------------------------------------------|-----------------------------------------------------------------------|
| GO DM/NC-Sema/DM in Transcriptome                                            | GO DM/NC-Sema/DM in proteomics                                        |
| GO:0006468~protein phosphorylation                                           | GO:0006811~monoatomic ion transport                                   |
| GO:0051963~regulation of synapse assembly                                    | GO:0007216~G protein-coupled glutamate receptor signaling pathway     |
| GO:0050821~protein stabilization                                             | GO:1903861~positive regulation of dendrite extension                  |
| GO:2000463~positive regulation of excitatory postsynaptic potential          | GO:0035249~synaptic transmission, glutamatergic                       |
| GO:0007411~axon guidance                                                     | GO:0071277~cellular response to calcium ion                           |
| GO:0071108~protein K48-linked deubiquitination                               | GO:1900271~regulation of long-term synaptic potentiation              |
| GO:0050808~synapse organization                                              | GO:0034220~monoatomic ion transmembrane transport                     |
| GO:0008285~negative regulation of cell population proliferation              | GO:0008360~regulation of cell shape                                   |
| GO:0007399~nervous system development                                        | GO:0016601~Rac protein signal transduction                            |
| GO:0016310~phosphorylation                                                   | GO:0014059~regulation of dopamine secretion                           |
| GO:0006915~apoptotic process                                                 | GO:0098712~L-glutamate import across plasma membrane                  |
| GO:0030036~actin cytoskeleton organization                                   | GO:1905920~positive regulation of CoA-transferase activity            |
| GO:0010976~positive regulation of neuron projection development              | GO:0031032~actomyosin structure organization                          |
| GO:0043161~proteasome-mediated ubiquitin-dependent protein catabolic process | GO:0030041~actin filament polymerization                              |
| GO:0008344~adult locomotory behavior                                         | GO:0010960~magnesium ion homeostasis                                  |
| GO:0007015~actin filament organization                                       | GO:0006730~one-carbon metabolic process                               |
| GO:0007275~multicellular organism development                                | GO:0048146~positive regulation of fibroblast proliferation            |
| GO:0001933~negative regulation of protein phosphorylation                    | GO:0007204~positive regulation of cytosolic calcium ion concentration |
| GO:0051965~positive regulation of synapse assembly                           | GO:0009410~response to xenobiotic stimulus                            |
| GO:0043066~negative regulation of apoptotic process                          | GO:0010976~positive regulation of neuron projection development       |
| GO:0070536~protein K63-linked deubiquitination                               | GO:0001881~receptor recycling                                         |
| GO:0050885~neuromuscular process controlling balance                         | GO:2000772~regulation of cellular senescence                          |

|                                                                      |                                                                                       |
|----------------------------------------------------------------------|---------------------------------------------------------------------------------------|
| GO:0090630~activation of GTPase activity                             | GO:0007611~learning or memory                                                         |
| GO:0001701~in utero embryonic development                            | GO:0007528~neuromuscular junction development                                         |
| GO:0015031~protein transport                                         | GO:0006515~protein quality control for misfolded or incompletely synthesized proteins |
| GO:0007628~adult walking behavior                                    | GO:0050804~modulation of chemical synaptic transmission                               |
| GO:0045893~positive regulation of DNA-templated transcription        | GO:0045723~positive regulation of fatty acid biosynthetic process                     |
| GO:0098609~cell-cell adhesion                                        | GO:0098962~regulation of postsynaptic neurotransmitter receptor activity              |
| GO:0001764~neuron migration                                          | GO:0032469~endoplasmic reticulum calcium ion homeostasis                              |
| GO:0007409~axonogenesis                                              | GO:0060041~retina development in camera-type eye                                      |
| GO:0006513~protein monoubiquitination                                | GO:0030178~negative regulation of Wnt signaling pathway                               |
| GO:0007626~locomotory behavior                                       | GO:0007268~chemical synaptic transmission                                             |
| GO:0006357~regulation of transcription by RNA polymerase II          | GO:0007162~negative regulation of cell adhesion                                       |
| GO:0015813~L-glutamate transmembrane transport                       | GO:0030048~actin filament-based movement                                              |
| GO:0031175~neuron projection development                             | GO:0015813~L-glutamate transmembrane transport                                        |
| GO:0070507~regulation of microtubule cytoskeleton organization       | GO:0048144~fibroblast proliferation                                                   |
| GO:0016579~protein deubiquitination                                  | GO:0022008~neurogenesis                                                               |
| GO:0043087~regulation of GTPase activity                             | GO:0031290~retinal ganglion cell axon guidance                                        |
| GO:0150052~regulation of postsynapse assembly                        | GO:0099509~regulation of presynaptic cytosolic calcium ion concentration              |
| GO:0022011~myelination in peripheral nervous system                  | GO:0016082~synaptic vesicle priming                                                   |
| GO:0043524~negative regulation of neuron apoptotic process           | GO:0017158~regulation of calcium ion-dependent exocytosis                             |
| GO:0019227~neuronal action potential propagation                     | GO:0043065~positive regulation of apoptotic process                                   |
| GO:0060079~excitatory postsynaptic potential                         | GO:0009611~response to wounding                                                       |
| GO:0045944~positive regulation of transcription by RNA polymerase II | GO:0014009~glial cell proliferation                                                   |
| GO:0030335~positive regulation of cell migration                     | GO:0060292~long-term synaptic depression                                              |
| GO:0046329~negative regulation of JNK cascade                        | GO:0006629~lipid metabolic process                                                    |
| GO:0016192~vesicle-mediated transport                                | GO:0031175~neuron projection development                                              |

|                                                                              |                                                                    |
|------------------------------------------------------------------------------|--------------------------------------------------------------------|
| GO:0007616~long-term memory                                                  | GO:0051301~cell division                                           |
| GO:0007010~cytoskeleton organization                                         | GO:0001676~long-chain fatty acid metabolic process                 |
| GO:0071346~cellular response to type II interferon                           | GO:0061098~positive regulation of protein tyrosine kinase activity |
| GO:0045785~positive regulation of cell adhesion                              | GO:0010842~retina layer formation                                  |
| GO:0008306~associative learning                                              | GO:0050770~regulation of axonogenesis                              |
| GO:0043410~positive regulation of MAPK cascade                               | GO:0007626~locomotory behavior                                     |
| GO:0010761~fibroblast migration                                              | GO:0048167~regulation of synaptic plasticity                       |
| GO:0043065~positive regulation of apoptotic process                          | GO:0016310~phosphorylation                                         |
| GO:0010628~positive regulation of gene expression                            | GO:0006814~sodium ion transport                                    |
| GO:0035235~ionotropic glutamate receptor signaling pathway                   | GO:0051453~regulation of intracellular pH                          |
| GO:0033674~positive regulation of kinase activity                            | GO:0048168~regulation of neuronal synaptic plasticity              |
| GO:0034599~cellular response to oxidative stress                             | GO:0006885~regulation of pH                                        |
| GO:0006417~regulation of translation                                         | GO:0007399~nervous system development                              |
| GO:0045669~positive regulation of osteoblast differentiation                 | GO:0007155~cell adhesion                                           |
| GO:0035264~multicellular organism growth                                     | GO:0007605~sensory perception of sound                             |
| GO:1902950~regulation of dendritic spine maintenance                         | GO:0007411~axon guidance                                           |
| GO:0030951~establishment or maintenance of microtubule cytoskeleton polarity | GO:0008104~protein localization                                    |
| GO:0051726~regulation of cell cycle                                          | GO:0043087~regulation of GTPase activity                           |
| GO:0007049~cell cycle                                                        | GO:0032691~negative regulation of interleukin-1 beta production    |
| GO:0045666~positive regulation of neuron differentiation                     | GO:0070373~negative regulation of ERK1 and ERK2 cascade            |
| GO:0035249~synaptic transmission, glutamatergic                              | GO:0018108~peptidyl-tyrosine phosphorylation                       |
| GO:0018105~peptidyl-serine phosphorylation                                   | GO:0006821~chloride transport                                      |
| GO:0007169~cell surface receptor protein tyrosine kinase signaling pathway   | GO:0055085~transmembrane transport                                 |
| GO:0030154~cell differentiation                                              | GO:0006816~calcium ion transport                                   |
| GO:0000226~microtubule cytoskeleton organization                             | GO:0032849~positive regulation of cellular pH reduction            |

|                                                                                                      |                                                                                                                                |
|------------------------------------------------------------------------------------------------------|--------------------------------------------------------------------------------------------------------------------------------|
| GO:0007611~learning or memory                                                                        | GO:0060689~cell differentiation involved in salivary gland development                                                         |
| GO:0035418~protein localization to synapse                                                           | GO:0000154~rRNA modification                                                                                                   |
| GO:0051489~regulation of filopodium assembly                                                         | GO:0021780~glial cell fate specification                                                                                       |
| GO:0021702~cerebellar Purkinje cell differentiation                                                  | GO:2001238~positive regulation of extrinsic apoptotic signaling pathway                                                        |
| GO:0001958~endochondral ossification                                                                 | GO:0090314~positive regulation of protein targeting to membrane                                                                |
| GO:0007416~synapse assembly                                                                          | GO:0007005~mitochondrion organization                                                                                          |
| GO:0007420~brain development                                                                         | GO:0051726~regulation of cell cycle                                                                                            |
| GO:0051968~positive regulation of synaptic transmission, glutamatergic                               | GO:0070050~neuron cellular homeostasis                                                                                         |
| GO:0032465~regulation of cytokinesis                                                                 | GO:0099149~regulation of postsynaptic neurotransmitter receptor internalization                                                |
| GO:1905606~regulation of presynapse assembly                                                         | GO:0051968~positive regulation of synaptic transmission, glutamatergic                                                         |
| GO:0033138~positive regulation of peptidyl-serine phosphorylation                                    | GO:0098609~cell-cell adhesion                                                                                                  |
| GO:0001666~response to hypoxia                                                                       | GO:2001225~regulation of chloride transport                                                                                    |
| GO:0007165~signal transduction                                                                       | GO:1904778~positive regulation of protein localization to cell cortex                                                          |
| GO:0051897~positive regulation of phosphatidylinositol 3-kinase/protein kinase B signal transduction | GO:0016055~Wnt signaling pathway                                                                                               |
| GO:0051893~regulation of focal adhesion assembly                                                     | GO:0016525~negative regulation of angiogenesis                                                                                 |
| GO:0021987~cerebral cortex development                                                               | GO:1900026~positive regulation of substrate adhesion-dependent cell spreading                                                  |
| GO:0050772~positive regulation of axonogenesis                                                       | GO:0140009~L-aspartate import across plasma membrane                                                                           |
| GO:0031647~regulation of protein stability                                                           | GO:0099502~calcium-dependent activation of synaptic vesicle fusion                                                             |
| GO:0032543~mitochondrial translation                                                                 | GO:1902961~positive regulation of aspartic-type endopeptidase activity involved in amyloid precursor protein catabolic process |
| GO:0006412~translation                                                                               | GO:0086073~bundle of His cell-Purkinje myocyte adhesion involved in cell communication                                         |
| GO:0008380~RNA splicing                                                                              | GO:0009449~gamma-aminobutyric acid biosynthetic process                                                                        |

|                                                                                         |                                                                                              |
|-----------------------------------------------------------------------------------------|----------------------------------------------------------------------------------------------|
| GO:0050773~regulation of dendrite development                                           | GO:1905244~regulation of modification of synaptic structure                                  |
| GO:0007098~centrosome cycle                                                             | GO:0070059~intrinsic apoptotic signaling pathway in response to endoplasmic reticulum stress |
| GO:0051402~neuron apoptotic process                                                     | GO:0050853~B cell receptor signaling pathway                                                 |
| GO:0002931~response to ischemia                                                         | GO:0099072~regulation of postsynaptic membrane neurotransmitter receptor levels              |
| GO:0016567~protein ubiquitination                                                       | GO:0005737~cytoplasm                                                                         |
| GO:0032956~regulation of actin cytoskeleton organization                                | GO:0098978~glutamatergic synapse                                                             |
| GO:0000381~regulation of alternative mRNA splicing, via spliceosome                     | GO:0045202~synapse                                                                           |
| GO:0065003~protein-containing complex assembly                                          | GO:0030425~dendrite                                                                          |
| GO:0030501~positive regulation of bone mineralization                                   | GO:0016020~membrane                                                                          |
| GO:2000010~positive regulation of protein localization to cell surface                  | GO:0045211~postsynaptic membrane                                                             |
| GO:0021954~central nervous system neuron development                                    | GO:0030424~axon                                                                              |
| GO:1900016~negative regulation of cytokine production involved in inflammatory response | GO:0005886~plasma membrane                                                                   |
| GO:0090398~cellular senescence                                                          | GO:0042995~cell projection                                                                   |
| GO:0008088~axo-dendritic transport                                                      | GO:0005829~cytosol                                                                           |
| GO:0001702~gastrulation with mouth forming second                                       | GO:0098688~parallel fiber to Purkinje cell synapse                                           |
| GO:0048814~regulation of dendrite morphogenesis                                         | GO:0043197~dendritic spine                                                                   |
| GO:0051247~positive regulation of protein metabolic process                             | GO:0098839~postsynaptic density membrane                                                     |
| GO:0072593~reactive oxygen species metabolic process                                    | GO:0043005~neuron projection                                                                 |
| GO:0006511~ubiquitin-dependent protein catabolic process                                | GO:0043025~neuronal cell body                                                                |
| GO:0051260~protein homooligomerization                                                  | GO:0005856~cytoskeleton                                                                      |
| GO:0000122~negative regulation of transcription by RNA polymerase II                    | GO:0005739~mitochondrion                                                                     |
| GO:0070374~positive regulation of ERK1 and ERK2 cascade                                 | GO:0042734~presynaptic membrane                                                              |

|                                                                            |                                                          |
|----------------------------------------------------------------------------|----------------------------------------------------------|
| GO:0072583~clathrin-dependent endocytosis                                  | GO:0043204~perikaryon                                    |
| GO:0043484~regulation of RNA splicing                                      | GO:0043195~terminal bouton                               |
| GO:0008542~visual learning                                                 | GO:0048471~perinuclear region of cytoplasm               |
| GO:0010629~negative regulation of gene expression                          | GO:0016323~basolateral plasma membrane                   |
| GO:0090129~positive regulation of synapse maturation                       | GO:0005654~nucleoplasm                                   |
| GO:1902414~protein localization to cell junction                           | GO:0016328~lateral plasma membrane                       |
| GO:0097107~postsynaptic density assembly                                   | GO:0070161~anchoring junction                            |
| GO:1900408~negative regulation of cellular response to oxidative stress    | GO:0014069~postsynaptic density                          |
| GO:0010669~epithelial structure maintenance                                | GO:0009986~cell surface                                  |
| GO:0030182~neuron differentiation                                          | GO:0005912~adherens junction                             |
| GO:0016477~cell migration                                                  | GO:0005783~endoplasmic reticulum                         |
| GO:0007018~microtubule-based movement                                      | GO:0098794~postsynapse                                   |
| GO:0051262~protein tetramerization                                         | GO:0005634~nucleus                                       |
| GO:1902894~negative regulation of miRNA transcription                      | GO:0030027~lamellipodium                                 |
| GO:0006897~endocytosis                                                     | GO:0098793~presynapse                                    |
| GO:0001938~positive regulation of endothelial cell proliferation           | GO:0005794~Golgi apparatus                               |
| GO:0008360~regulation of cell shape                                        | GO:0032809~neuronal cell body membrane                   |
| GO:0048169~regulation of long-term neuronal synaptic plasticity            | GO:0032437~cuticular plate                               |
| GO:0048168~regulation of neuronal synaptic plasticity                      | GO:0016363~nuclear matrix                                |
| GO:0006260~DNA replication                                                 | GO:0030426~growth cone                                   |
| GO:0050804~modulation of chemical synaptic transmission                    | GO:0015629~actin cytoskeleton                            |
| GO:0043547~positive regulation of GTPase activity                          | GO:0031965~nuclear membrane                              |
| GO:0007156~homophilic cell adhesion via plasma membrane adhesion molecules | GO:0097431~mitotic spindle pole                          |
| GO:0061003~positive regulation of dendritic spine morphogenesis            | GO:0016459~myosin complex                                |
| GO:0018108~peptidyl-tyrosine phosphorylation                               | GO:0099092~postsynaptic density, intracellular component |
| GO:0006397~mRNA processing                                                 | GO:0032153~cell division site                            |
| GO:0090136~epithelial cell-cell adhesion                                   | GO:0005637~nuclear inner membrane                        |

|                                                                                        |                                                   |
|----------------------------------------------------------------------------------------|---------------------------------------------------|
| GO:0043030~regulation of macrophage activation                                         | GO:0034707~chloride channel complex               |
| GO:1900273~positive regulation of long-term synaptic potentiation                      | GO:0005743~mitochondrial inner membrane           |
| GO:0043523~regulation of neuron apoptotic process                                      | GO:0036477~somatodendritic compartment            |
| GO:0055001~muscle cell development                                                     | GO:0009898~cytoplasmic side of plasma membrane    |
| GO:0010467~gene expression                                                             | GO:0098686~hippocampal mossy fiber to CA3 synapse |
| GO:0008283~cell population proliferation                                               | GO:0005769~early endosome                         |
| GO:0034614~cellular response to reactive oxygen species                                | GO:0031410~cytoplasmic vesicle                    |
| GO:0016311~dephosphorylation                                                           | GO:0032281~AMPA glutamate receptor complex        |
| GO:0051549~positive regulation of keratinocyte migration                               | GO:0016604~nuclear body                           |
| GO:0098884~postsynaptic neurotransmitter receptor internalization                      | GO:0072686~mitotic spindle                        |
| GO:0051093~negative regulation of developmental process                                | GO:0098796~membrane protein complex               |
| GO:0050806~positive regulation of synaptic transmission                                | GO:0034702~monoatomic ion channel complex         |
| GO:0007005~mitochondrion organization                                                  | GO:0016529~sarcoplasmic reticulum                 |
| GO:0010977~negative regulation of neuron projection development                        | GO:0031090~organelle membrane                     |
| GO:0030334~regulation of cell migration                                                | GO:0097513~myosin II filament                     |
| GO:0008203~cholesterol metabolic process                                               | GO:0005730~nucleolus                              |
| GO:0043406~positive regulation of MAP kinase activity                                  | GO:0005635~nuclear envelope                       |
| GO:0048488~synaptic vesicle endocytosis                                                | GO:0005640~nuclear outer membrane                 |
| GO:1904706~negative regulation of vascular associated smooth muscle cell proliferation | GO:0044305~calyx of Held                          |
| GO:0045892~negative regulation of DNA-templated transcription                          | GO:0005768~endosome                               |
| GO:0009790~embryo development                                                          | GO:0005902~microvillus                            |
| GO:1904753~negative regulation of vascular associated smooth muscle cell migration     | GO:0098982~GABA-ergic synapse                     |
| GO:0038202~TORC1 signaling                                                             | GO:0032590~dendrite membrane                      |
| GO:0006325~chromatin organization                                                      | GO:0097427~microtubule bundle                     |
| GO:0007160~cell-matrix adhesion                                                        | GO:0005615~extracellular space                    |

|                                                                         |                                                   |
|-------------------------------------------------------------------------|---------------------------------------------------|
| GO:0051881~regulation of mitochondrial membrane potential               | GO:0043679~axon terminus                          |
| GO:0007026~negative regulation of microtubule depolymerization          | GO:0005694~chromosome                             |
| GO:0032526~response to retinoic acid                                    | GO:0005515~protein binding                        |
| GO:0045471~response to ethanol                                          | GO:0051015~actin filament binding                 |
| GO:0008284~positive regulation of cell population proliferation         | GO:0042802~identical protein binding              |
| GO:0050727~regulation of inflammatory response                          | GO:0003779~actin binding                          |
| GO:0070050~neuron cellular homeostasis                                  | GO:0005544~calcium-dependent phospholipid binding |
| GO:0061635~regulation of protein complex stability                      | GO:0005524~ATP binding                            |
| GO:0070306~lens fiber cell differentiation                              | GO:0000166~nucleotide binding                     |
| GO:0006974~DNA damage response                                          | GO:0004089~carbonate dehydratase activity         |
| GO:0044331~cell-cell adhesion mediated by cadherin                      | GO:0044877~protein-containing complex binding     |
| GO:0001578~microtubule bundle formation                                 | GO:0003690~double-stranded DNA binding            |
| GO:0050775~positive regulation of dendrite morphogenesis                | GO:0016829~lyase activity                         |
| GO:0060291~long-term synaptic potentiation                              | GO:0046872~metal ion binding                      |
| GO:2000316~regulation of T-helper 17 type immune response               | GO:0015293~symporter activity                     |
| GO:0032014~positive regulation of ARF protein signal transduction       | GO:0016491~oxidoreductase activity                |
| GO:1904161~DNA synthesis involved in UV-damage excision repair          | GO:0003774~cytoskeletal motor activity            |
| GO:0051649~establishment of localization in cell                        | GO:0019904~protein domain specific binding        |
| GO:0061061~muscle structure development                                 | GO:0048487~beta-tubulin binding                   |
| GO:0010633~negative regulation of epithelial cell migration             | GO:0097110~scaffold protein binding               |
| GO:0031110~regulation of microtubule polymerization or depolymerization | GO:0005516~calmodulin binding                     |
| GO:0001824~blastocyst development                                       | GO:0060090~molecular adaptor activity             |
| GO:0015914~phospholipid transport                                       | GO:0008289~lipid binding                          |
| GO:0035176~social behavior                                              | GO:0000400~four-way junction DNA binding          |
| GO:0016322~neuron remodeling                                            | GO:0016740~transferase activity                   |

|                                                                                                              |                                                                                                          |
|--------------------------------------------------------------------------------------------------------------|----------------------------------------------------------------------------------------------------------|
| GO:1902236~negative regulation of endoplasmic reticulum stress-induced intrinsic apoptotic signaling pathway | GO:0005178~integrin binding                                                                              |
| GO:0017148~negative regulation of translation                                                                | GO:0005216~monoatomic ion channel activity                                                               |
| GO:0048675~axon extension                                                                                    | GO:0000287~magnesium ion binding                                                                         |
| GO:2000134~negative regulation of G1/S transition of mitotic cell cycle                                      | GO:0019903~protein phosphatase binding                                                                   |
| GO:0009060~aerobic respiration                                                                               | GO:0005509~calcium ion binding                                                                           |
| GO:0043433~negative regulation of DNA-binding transcription factor activity                                  | GO:0008046~axon guidance receptor activity                                                               |
| GO:0042391~regulation of membrane potential                                                                  | GO:0099534~calcium ion binding involved in regulation of presynaptic cytosolic calcium ion concentration |
| GO:1902430~negative regulation of amyloid-beta formation                                                     | GO:0016209~antioxidant activity                                                                          |
| GO:0006376~mRNA splice site recognition                                                                      | GO:0019905~syntaxin binding                                                                              |
| GO:0045859~regulation of protein kinase activity                                                             | GO:0005543~phospholipid binding                                                                          |
| GO:0060134~prepulse inhibition                                                                               | GO:0016301~kinase activity                                                                               |
| GO:0006979~response to oxidative stress                                                                      | GO:0004713~protein tyrosine kinase activity                                                              |
| GO:0030534~adult behavior                                                                                    | GO:0017124~SH3 domain binding                                                                            |
| GO:0006470~protein dephosphorylation                                                                         | GO:0004672~protein kinase activity                                                                       |
| GO:0090090~negative regulation of canonical Wnt signaling pathway                                            | GO:0005200~structural constituent of cytoskeleton                                                        |
| GO:0007612~learning                                                                                          | GO:0140297~DNA-binding transcription factor binding                                                      |
| GO:0009749~response to glucose                                                                               | GO:0016807~cysteine-type carboxypeptidase activity                                                       |
| GO:0061564~axon development                                                                                  | GO:0015276~ligand-gated monoatomic ion channel activity                                                  |
| GO:0045214~sarcomere organization                                                                            | GO:0015631~tubulin binding                                                                               |
| GO:0045773~positive regulation of axon extension                                                             | GO:0001786~phosphatidylserine binding                                                                    |
| GO:0006801~superoxide metabolic process                                                                      | GO:0005254~chloride channel activity                                                                     |
| GO:0051056~regulation of small GTPase mediated signal transduction                                           | GO:0046875~ephrin receptor binding                                                                       |
| GO:0002042~cell migration involved in sprouting angiogenesis                                                 | GO:0017080~sodium channel regulator activity                                                             |
| GO:0000266~mitochondrial fission                                                                             | GO:0005314~high-affinity L-glutamate transmembrane transporter activity                                  |

|                                                                     |                                                                      |
|---------------------------------------------------------------------|----------------------------------------------------------------------|
| GO:0030031~cell projection assembly                                 | GO:0005246~calcium channel regulator activity                        |
| GO:0050731~positive regulation of peptidyl-tyrosine phosphorylation | GO:0005262~calcium channel activity                                  |
| GO:0071363~cellular response to growth factor stimulus              | GO:0031267~small GTPase binding                                      |
| GO:0005737~cytoplasm                                                | GO:0000146~microfilament motor activity                              |
| GO:0042995~cell projection                                          | GO:1990269~RNA polymerase II C-terminal domain phosphoserine binding |
| GO:0098978~glutamatergic synapse                                    | GO:1902387~ceramide 1-phosphate binding                              |
| GO:0045202~synapse                                                  | GO:0097100~supercoiled DNA binding                                   |
| GO:0005634~nucleus                                                  | GO:1902388~ceramide 1-phosphate transfer activity                    |
| GO:0016020~membrane                                                 | GO:0015501~glutamate: sodium symporter activity                      |
| GO:0005856~cytoskeleton                                             | GO:0003682~chromatin binding                                         |
| GO:0043197~dendritic spine                                          | GO:0048306~calcium-dependent protein binding                         |
| GO:0014069~postsynaptic density                                     | GO:0030295~protein kinase activator activity                         |
| GO:0005768~endosome                                                 |                                                                      |
| GO:0030426~growth cone                                              |                                                                      |
| GO:0005886~plasma membrane                                          |                                                                      |
| GO:0005829~cytosol                                                  |                                                                      |
| GO:0005654~nucleoplasm                                              |                                                                      |
| GO:0030425~dendrite                                                 |                                                                      |
| GO:0043025~neuronal cell body                                       |                                                                      |
| GO:0098794~postsynapse                                              |                                                                      |
| GO:0030424~axon                                                     |                                                                      |
| GO:0048471~perinuclear region of cytoplasm                          |                                                                      |
| GO:0043005~neuron projection                                        |                                                                      |
| GO:0032991~protein-containing complex                               |                                                                      |
| GO:0045211~postsynaptic membrane                                    |                                                                      |
| GO:0031410~cytoplasmic vesicle                                      |                                                                      |
| GO:0098793~presynapse                                               |                                                                      |
| GO:0070161~anchoring junction                                       |                                                                      |
| GO:0031594~neuromuscular junction                                   |                                                                      |
| GO:0098839~postsynaptic density membrane                            |                                                                      |
| GO:0034451~centriolar satellite                                     |                                                                      |
| GO:0008021~synaptic vesicle                                         |                                                                      |
| GO:0005794~Golgi apparatus                                          |                                                                      |
| GO:0005874~microtubule                                              |                                                                      |
| GO:0048787~presynaptic active zone membrane                         |                                                                      |
| GO:0005911~cell-cell junction                                       |                                                                      |

|                                                    |  |
|----------------------------------------------------|--|
| GO:0044297~cell body                               |  |
| GO:0030027~lamellipodium                           |  |
| GO:0044304~main axon                               |  |
| GO:0001725~stress fiber                            |  |
| GO:1990904~ribonucleoprotein complex               |  |
| GO:0005783~endoplasmic reticulum                   |  |
| GO:0098686~hippocampal mossy fiber to CA3 synapse  |  |
| GO:0098843~postsynaptic endocytic zone             |  |
| GO:0060076~excitatory synapse                      |  |
| GO:0005813~centrosome                              |  |
| GO:0045177~apical part of cell                     |  |
| GO:0030673~axolemma                                |  |
| GO:0000139~Golgi membrane                          |  |
| GO:1990761~growth cone lamellipodium               |  |
| GO:0042734~presynaptic membrane                    |  |
| GO:0016605~PML body                                |  |
| GO:0005739~mitochondrion                           |  |
| GO:0098685~Schaffer collateral - CA1 synapse       |  |
| GO:0043198~dendritic shaft                         |  |
| GO:0005938~cell cortex                             |  |
| GO:0005730~nucleolus                               |  |
| GO:0098982~GABA-ergic synapse                      |  |
| GO:0001726~ruffle                                  |  |
| GO:0005622~intracellular anatomical structure      |  |
| GO:0000785~chromatin                               |  |
| GO:0005789~endoplasmic reticulum membrane          |  |
| GO:0030018~Z disc                                  |  |
| GO:0005925~focal adhesion                          |  |
| GO:0015630~microtubule cytoskeleton                |  |
| GO:0044307~dendritic branch                        |  |
| GO:0009986~cell surface                            |  |
| GO:0012505~endomembrane system                     |  |
| GO:0005923~bicellular tight junction               |  |
| GO:0036477~somatodendritic compartment             |  |
| GO:0098688~parallel fiber to Purkinje cell synapse |  |
| GO:0016607~nuclear speck                           |  |
| GO:0043195~terminal bouton                         |  |

|                                                      |  |
|------------------------------------------------------|--|
| GO:0043204~perikaryon                                |  |
| GO:0055038~recycling endosome membrane               |  |
| GO:0010008~endosome membrane                         |  |
| GO:0030054~cell junction                             |  |
| GO:0017146~NMDA selective glutamate receptor complex |  |
| GO:0032587~ruffle membrane                           |  |
| GO:0044306~neuron projection terminus                |  |
| GO:0005884~actin filament                            |  |
| GO:0043679~axon terminus                             |  |
| GO:0005765~lysosomal membrane                        |  |
| GO:0035371~microtubule plus-end                      |  |
| GO:0016528~sarcooplasm                               |  |
| GO:0005741~mitochondrial outer membrane              |  |
| GO:0005815~microtubule organizing center             |  |
| GO:0044291~cell-cell contact zone                    |  |
| GO:0016324~apical plasma membrane                    |  |
| GO:0005743~mitochondrial inner membrane              |  |
| GO:0055037~recycling endosome                        |  |
| GO:0031466~Cul5-RING ubiquitin ligase complex        |  |
| GO:0005769~early endosome                            |  |
| GO:0044309~neuron spine                              |  |
| GO:1990635~proximal dendrite                         |  |
| GO:0005778~peroxisomal membrane                      |  |
| GO:0005764~lysosome                                  |  |
| GO:0043231~intracellular membrane-bounded organelle  |  |
| GO:0005834~heterotrimeric G-protein complex          |  |
| GO:0015629~actin cytoskeleton                        |  |
| GO:0016323~basolateral plasma membrane               |  |
| GO:0005758~mitochondrial intermembrane space         |  |
| GO:0044305~calyx of Held                             |  |
| GO:0030864~cortical actin cytoskeleton               |  |
| GO:1904115~axon cytoplasm                            |  |
| GO:0097449~astrocyte projection                      |  |
| GO:0035253~ciliary rootlet                           |  |
| GO:0005905~clathrin-coated pit                       |  |
| GO:0043596~nuclear replication fork                  |  |

|                                                       |  |
|-------------------------------------------------------|--|
| GO:0005777~peroxisome                                 |  |
| GO:0097060~synaptic membrane                          |  |
| GO:0030136~clathrin-coated vesicle                    |  |
| GO:0005840~ribosome                                   |  |
| GO:0005515~protein binding                            |  |
| GO:0046872~metal ion binding                          |  |
| GO:0044877~protein-containing complex binding         |  |
| GO:0004672~protein kinase activity                    |  |
| GO:0016740~transferase activity                       |  |
| GO:0005096~GTPase activator activity                  |  |
| GO:0042802~identical protein binding                  |  |
| GO:0000166~nucleotide binding                         |  |
| GO:0016301~kinase activity                            |  |
| GO:0008017~microtubule binding                        |  |
| GO:0005524~ATP binding                                |  |
| GO:0001222~transcription corepressor binding          |  |
| GO:1990380~K48-linked deubiquitinase activity         |  |
| GO:0035255~ionotropic glutamate receptor binding      |  |
| GO:0004843~cysteine-type deubiquitinase activity      |  |
| GO:0019903~protein phosphatase binding                |  |
| GO:0005085~guanyl-nucleotide exchange factor activity |  |
| GO:0030674~protein-macromolecule adaptor activity     |  |
| GO:0060090~molecular adaptor activity                 |  |
| GO:0016787~hydrolase activity                         |  |
| GO:0003677~DNA binding                                |  |
| GO:0140297~DNA-binding transcription factor binding   |  |
| GO:0001540~amyloid-beta binding                       |  |
| GO:0051015~actin filament binding                     |  |
| GO:0106310~protein serine kinase activity             |  |
| GO:0004842~ubiquitin-protein transferase activity     |  |
| GO:0004713~protein tyrosine kinase activity           |  |
| GO:0019894~kinesin binding                            |  |
| GO:0042803~protein homodimerization activity          |  |

|                                                                    |  |
|--------------------------------------------------------------------|--|
| GO:0061630~ubiquitin protein ligase activity                       |  |
| GO:0008234~cysteine-type peptidase activity                        |  |
| GO:0004674~protein serine/threonine kinase activity                |  |
| GO:0031267~small GTPase binding                                    |  |
| GO:0005522~profilin binding                                        |  |
| GO:0030165~PDZ domain binding                                      |  |
| GO:0061578~K63-linked deubiquitinase activity                      |  |
| GO:0005030~neurotrophin receptor activity                          |  |
| GO:0003779~actin binding                                           |  |
| GO:0019899~enzyme binding                                          |  |
| GO:0019901~protein kinase binding                                  |  |
| GO:0004714~transmembrane receptor protein tyrosine kinase activity |  |
| GO:0008270~zinc ion binding                                        |  |
| GO:0015631~tubulin binding                                         |  |
| GO:0099186~structural constituent of postsynapse                   |  |
| GO:0035254~glutamate receptor binding                              |  |
| GO:0044325~transmembrane transporter binding                       |  |
| GO:0005102~signaling receptor binding                              |  |
| GO:0003723~RNA binding                                             |  |
| GO:0098632~cell-cell adhesion mediator activity                    |  |
| GO:0003676~nucleic acid binding                                    |  |
| GO:0005509~calcium ion binding                                     |  |
| GO:0005543~phospholipid binding                                    |  |
| GO:0019904~protein domain specific binding                         |  |
| GO:0004683~calmodulin-dependent protein kinase activity            |  |
| GO:0004972~NMDA glutamate receptor activity                        |  |
| GO:0008046~axon guidance receptor activity                         |  |
| GO:0008092~cytoskeletal protein binding                            |  |
| GO:0001221~transcription coregulator binding                       |  |
| GO:0003729~mRNA binding                                            |  |
| GO:0003690~double-stranded DNA binding                             |  |
| GO:0050839~cell adhesion molecule binding                          |  |
| GO:0005516~calmodulin binding                                      |  |
| GO:0051020~GTPase binding                                          |  |
| GO:0031698~beta-2 adrenergic receptor binding                      |  |

|                                                                                                                   |  |
|-------------------------------------------------------------------------------------------------------------------|--|
| GO:0000981~DNA-binding transcription factor activity, RNA polymerase II-specific                                  |  |
| GO:0004527~exonuclease activity                                                                                   |  |
| GO:0043565~sequence-specific DNA binding                                                                          |  |
| GO:0098919~structural constituent of postsynaptic density                                                         |  |
| GO:0043021~ribonucleoprotein complex binding                                                                      |  |
| GO:0031625~ubiquitin protein ligase binding                                                                       |  |
| GO:0010485~histone H4 acetyltransferase activity                                                                  |  |
| GO:0003682~chromatin binding                                                                                      |  |
| GO:0003924~GTPase activity                                                                                        |  |
| GO:0017124~SH3 domain binding                                                                                     |  |
| GO:0034236~protein kinase A catalytic subunit binding                                                             |  |
| GO:0030145~manganese ion binding                                                                                  |  |
| GO:0008134~transcription factor binding                                                                           |  |
| GO:0051087~protein-folding chaperone binding                                                                      |  |
| GO:0099508~voltage-gated monoatomic ion channel activity involved in regulation of presynaptic membrane potential |  |
| GO:0101005~deubiquitinase activity                                                                                |  |
| GO:0042826~histone deacetylase binding                                                                            |  |
| GO:0003730~mRNA 3'-UTR binding                                                                                    |  |
| GO:0003824~catalytic activity                                                                                     |  |
| GO:0005200~structural constituent of cytoskeleton                                                                 |  |
| GO:0008233~peptidase activity                                                                                     |  |
| GO:0030695~GTPase regulator activity                                                                              |  |
| GO:0003697~single-stranded DNA binding                                                                            |  |
| GO:0030971~receptor tyrosine kinase binding                                                                       |  |

Table SV. Expression of differentially expressed genes and differentially expressed proteins with the same trend for proteome and transcriptome in the comparison of T2DM vs. Control and Sema vs. T2DM pathway.

| KEGG DM/NC-Sema/DM in Transcriptome                       | KEGG DM/NC-Sema/DM in proteomics                          |
|-----------------------------------------------------------|-----------------------------------------------------------|
| mmu04360: Axon guidance                                   | mmu04724: Glutamatergic synapse                           |
| mmu04724: Glutamatergic synapse                           | mmu04964: Proximal tubule bicarbonate reclamation         |
| mmu04070: Phosphatidylinositol signaling system           | mmu05031: Amphetamine addiction                           |
| mmu04728: Dopaminergic synapse                            | mmu04260: Cardiac muscle contraction                      |
| mmu04921: Oxytocin signaling pathway                      | mmu01100: Metabolic pathways                              |
| mmu00562: Inositol phosphate metabolism                   | mmu04070: Phosphatidylinositol signaling system           |
| mmu04713: Circadian entrainment                           | mmu04261: Adrenergic signaling in cardiomyocytes          |
| mmu04720: Long-term potentiation                          | mmu04720: Long-term potentiation                          |
| mmu04725: Cholinergic synapse                             | mmu00071: Fatty acid degradation                          |
| mmu04211: Longevity regulating pathway                    | mmu00910: Nitrogen metabolism                             |
| mmu04010: MAPK signaling pathway                          | mmu04971: Gastric acid secretion                          |
| mmu04015: Rap1 signaling pathway                          | mmu04713: Circadian entrainment                           |
| mmu04810: Regulation of actin cytoskeleton                | mmu04530: Tight junction                                  |
| mmu05031: Amphetamine addiction                           | mmu04970: Salivary secretion                              |
| mmu04152: AMPK signaling pathway                          | mmu00562: Inositol phosphate metabolism                   |
| mmu04261: Adrenergic signaling in cardiomyocytes          | mmu04721: Synaptic vesicle cycle                          |
| mmu05231: Choline metabolism in cancer                    | mmu04810: Regulation of actin cytoskeleton                |
| mmu04140: Autophagy - animal                              | mmu04730: Long-term depression                            |
| mmu05211: Renal cell carcinoma                            | mmu05017: Spinocerebellar ataxia                          |
| mmu05200: Pathways in cancer                              | mmu01212: Fatty acid metabolism                           |
| mmu04024: cAMP signaling pathway                          | mmu04925: Aldosterone synthesis and secretion             |
| mmu04510: Focal adhesion                                  | mmu05412: Arrhythmogenic right ventricular cardiomyopathy |
| mmu04722: Neurotrophin signaling pathway                  | mmu04911: Insulin secretion                               |
| mmu05017: Spinocerebellar ataxia                          | mmu04024: cAMP signaling pathway                          |
| mmu04911: Insulin secretion                               | mmu04360: Axon guidance                                   |
| mmu04926: Relaxin signaling pathway                       | mmu04666: Fc gamma R-mediated phagocytosis                |
| mmu05212: Pancreatic cancer                               | mmu04918: Thyroid hormone synthesis                       |
| mmu04213: Longevity regulating pathway - multiple species | mmu00564: Glycerophospholipid metabolism                  |
| mmu04520: Adherens junction                               | mmu00280: Valine, leucine and isoleucine degradation      |
| mmu04022: cGMP-PKG signaling pathway                      | mmu00900: Terpenoid backbone biosynthesis                 |

|                                                               |                                                             |
|---------------------------------------------------------------|-------------------------------------------------------------|
| mmu01522: Endocrine resistance                                | mmu05022: Pathways of neurodegeneration - multiple diseases |
| mmu05210: Colorectal cancer                                   | mmu00230: Purine metabolism                                 |
| mmu04928: Parathyroid hormone synthesis, secretion and action | mmu04728: Dopaminergic synapse                              |
| mmu04910: Insulin signaling pathway                           | mmu04022: cGMP-PKG signaling pathway                        |
| mmu04935: Growth hormone synthesis, secretion and action      | mmu05100: Bacterial invasion of epithelial cells            |
| mmu05213: Endometrial cancer                                  | mmu04820: Cytoskeleton in muscle cells                      |
| mmu04371: Apelin signaling pathway                            | mmu04921: Oxytocin signaling pathway                        |
| mmu04922: Glucagon signaling pathway                          | mmu05414: Dilated cardiomyopathy                            |
| mmu05224: Breast cancer                                       | mmu05415: Diabetic cardiomyopathy                           |
| mmu05417: Lipid and atherosclerosis                           | mmu05135: <i>Yersinia</i> infection                         |
| mmu04120: Ubiquitin mediated proteolysis                      |                                                             |
| mmu04710: Circadian rhythm                                    |                                                             |
| mmu04020: Calcium signaling pathway                           |                                                             |
| mmu05214: Glioma                                              |                                                             |
| mmu05220: Chronic myeloid leukemia                            |                                                             |
| mmu05030: Cocaine addiction                                   |                                                             |
| mmu05223: Non-small cell lung cancer                          |                                                             |
| mmu04912: GnRH signaling pathway                              |                                                             |
| mmu04068: FoxO signaling pathway                              |                                                             |
| mmu04924: Renin secretion                                     |                                                             |
| mmu04721: Synaptic vesicle cycle                              |                                                             |
| mmu04915: Estrogen signaling pathway                          |                                                             |
| mmu05218: Melanoma                                            |                                                             |
| mmu05414: Dilated cardiomyopathy                              |                                                             |
| mmu05135: <i>Yersinia</i> infection                           |                                                             |
| mmu05410: Hypertrophic cardiomyopathy                         |                                                             |
| mmu04925: Aldosterone synthesis and secretion                 |                                                             |
| mmu04927: Cortisol synthesis and secretion                    |                                                             |
| mmu04668: TNF signaling pathway                               |                                                             |
| mmu05222: Small cell lung cancer                              |                                                             |
| mmu04930: Type 2 diabetes mellitus                            |                                                             |
| mmu04918: Thyroid hormone synthesis                           |                                                             |
| mmu04917: Prolactin signaling pathway                         |                                                             |
| mmu05217: Basal cell carcinoma                                |                                                             |
| mmu04380: Osteoclast differentiation                          |                                                             |

T2DM, type 2 diabetes mellitus; KEGG, Kyoto Encyclopedia of Genes and Genomes.

Table SVI. Expression of differentially expressed genes and differentially expressed proteins reversed by semaglutide in proteome and transcriptome in the comparison of DM vs. NC and Sema vs. DM pathway.

| Kyoto Encyclopedia of Genes and Genomes              | Transcriptome |                | Proteome     |                 | ACOX1      |
|------------------------------------------------------|---------------|----------------|--------------|-----------------|------------|
|                                                      | DM vs. NC FC  | Sema vs. DM FC | DM vs. NC FC | Sema- vs. DM FC | Enrichment |
| mmu00071: Fatty acid degradation                     | 2.809         | 2.782          | 5.734        | 2.433           | Yes        |
| mmu00230: Purine metabolism                          | 3.138         | 3.320          | 11.043       | 2.182           |            |
| mmu00280: Valine, leucine and isoleucine degradation | 3.161         | 3.029          | 6.508        | 1.547           |            |
| mmu00562: Inositol phosphate metabolism              | 2.533         | 3.694          | 5.030        | 2.590           |            |
| mmu00564: Glycerophospholipid metabolism             | 2.412         | 2.836          | 4.290        | 2.469           |            |
| mmu00900: Terpenoid backbone biosynthesis            | 3.189         | 2.418          | 1.501        | 2.525           |            |
| mmu00910: Nitrogen metabolism                        | 2.358         | 2.686          | 3.261        | 2.072           |            |
| mmu01100: Metabolic pathways                         | 2.734         | 2.508          | 3.977        | 2.396           | Yes        |
| mmu01212: Fatty acid metabolism                      | 3.060         | 2.452          | 3.622        | 2.783           | Yes        |
| mmu04022: cGMP-PKG signaling pathway                 | 2.674         | 2.497          | 3.115        | 2.453           | Yes        |
| mmu04024: cAMP signaling pathway                     | 2.468         | 2.247          | 4.662        | 2.858           |            |
| mmu04070: Phosphatidylinositol signaling system      | 2.180         | 1.824          | 5.340        | 2.696           |            |
| mmu04260: Cardiac muscle contraction                 | 2.642         | 2.414          | 10.208       | 2.805           |            |
| mmu04261: Adrenergic signaling in cardiomyocytes     | 1.810         | 2.637          | 4.165        | 2.125           |            |
| mmu04360: Axon guidance                              | 1.954         | 1.974          | 3.506        | 3.178           |            |
| mmu04530: Tight junction                             | 1.909         | 2.583          | 2.515        | 1.943           |            |
| mmu04666: Fc gamma R-mediated phagocytosis           | 2.852         | 2.717          | 2.323        | 2.140           |            |
| mmu04713: Circadian entrainment                      | 1.822         | 2.044          | 2.670        | 2.951           |            |
| mmu04720: Long-term potentiation                     | 2.260         | 2.300          | 3.590        | 4.040           |            |
| mmu04721: Synaptic vesicle cycle                     | 2.147         | 2.371          | 3.856        | 2.384           |            |
| mmu04724: Glutamatergic synapse                      | 1.876         | 1.847          | 2.283        | 2.765           |            |
| mmu04728: Dopaminergic synapse                       | 2.103         | 2.180          | 3.606        | 2.380           |            |
| mmu04730: Long-term depression                       | 2.427         | 3.684          | 2.244        | 4.803           |            |

|                                                             |       |       |       |       |  |
|-------------------------------------------------------------|-------|-------|-------|-------|--|
| mmu04810: Regulation of actin cytoskeleton                  | 2.013 | 1.763 | 4.049 | 3.578 |  |
| mmu04820: Cytoskeleton in muscle cells                      | 2.695 | 1.810 | 2.708 | 2.503 |  |
| mmu04911: Insulin secretion                                 | 1.889 | 2.240 | 3.919 | 2.069 |  |
| mmu04918: Thyroid hormone synthesis                         | 1.990 | 2.632 | 3.033 | 1.722 |  |
| mmu04921: Oxytocin signaling pathway                        | 1.497 | 2.072 | 3.229 | 1.912 |  |
| mmu04925: Aldosterone synthesis and secretion               | 1.831 | 2.782 | 3.229 | 2.102 |  |
| mmu04964: Proximal tubule bicarbonate reclamation           | 2.187 | 2.562 | 2.169 | 2.227 |  |
| mmu04970: Salivary secretion                                | 2.734 | 1.832 | 3.120 | 2.281 |  |
| mmu04971: Gastric acid secretion                            | 1.868 | 2.247 | 2.301 | 2.938 |  |
| mmu05017: Spinocerebellar ataxia                            | 2.169 | 2.616 | 2.954 | 2.120 |  |
| mmu05022: Pathways of neurodegeneration - multiple diseases | 2.441 | 2.279 | 3.283 | 1.660 |  |
| mmu05031: Amphetamine addiction                             | 2.369 | 3.098 | 2.833 | 2.108 |  |
| mmu05100: Bacterial invasion of epithelial cells            | 1.743 | 2.540 | 3.653 | 2.750 |  |
| mmu05135: <i>Yersinia</i> infection                         | 1.972 | 1.866 | 2.777 | 2.535 |  |
| mmu05412: Arrhythmogenic right ventricular cardiomyopathy   | 2.036 | 1.962 | 6.036 | 2.149 |  |
| mmu05414: Dilated cardiomyopathy                            | 2.384 | 2.164 | 2.314 | 2.199 |  |
| mmu05415: Diabetic cardiomyopathy                           | 2.082 | 2.434 | 3.414 | 3.189 |  |

DM, diabetes mellitus; NC, negative control.
